## Genome-wide association, prediction and heritability in bacteria

Sudaraka Mallawaarachchi<sup>1,\*</sup>, Gerry Tonkin-Hill<sup>2</sup>, Nicholas J. Croucher<sup>3</sup>, Paul Turner<sup>4,5</sup>, Doug Speed<sup>6,7,8</sup>, Jukka Corander<sup>2,9,10</sup>, David Balding<sup>1,8,11,\*</sup>

**1** Melbourne Integrative Genomics, School of Mathematics and Statistics, University of Melbourne, VIC, Australia

**2** Parasites and Microbes, Wellcome Sanger Institute, Cambridge, UK

**3** Faculty of Medicine, School of Public Health, Imperial College, London, UK

**4** Cambodia-Oxford Medical Research Unit, Angkor Hospital for Children, Siem Reap, Cambodia

**5** Centre for Tropical Medicine and Global Health, Nuffield Department of Medicine, University of Oxford, Oxford, UK

**6** Aarhus Institute of Advanced Studies (AIAS), Aarhus University, Denmark

**7** Bioinformatics Research Centre, Aarhus University, Denmark

**8** UCL Genetics Institute, University College London, United Kingdom

**9** Department of Biostatistics, Faculty of Medicine, University of Oslo, Oslo, Norway.

**10** Helsinki Institute of Information Technology, Department of Mathematics and Statistics, University of Helsinki, Helsinki, Finland.

**11** School of BioSciences, University of Melbourne, VIC, Australia \*

(sudaraka.mallawaarachchi,dbalding)@unimelb.edu.au

## Abstract

Advances in whole-genome genotyping and sequencing have allowed genome-wide analyses of association, prediction and heritability in many organisms. However, the application of such analyses to bacteria is still in its infancy, being limited by difficulties including the plasticity of bacterial genomes and their strong population structure. Here we propose a suite of genome-wide analyses for bacteria that combines methods from human genetics and previous bacterial studies, including linear mixed models, elastic net and LD-score regression. We introduce innovations such as frequency-based allele coding, testing for both insertion/deletion and nucleotide effects and partitioning heritability by genome region. Using a previously-published large cohort study, we analyse three phenotypes of a major human pathogen *Streptococcus pneumoniae*, including the first analyses of minimum inhibitory concentrations (MIC) for each of two antibiotics, penicillin and ceftriaxone. We show that these are very highly heritable leading to high prediction accuracy, which is explained by many genetic associations identified under good control of population structure effects. In the case of ceftriaxone MIC, these results are surprising because none of the isolates was resistant according to the inhibition zone diameter threshold. We estimate that just over half of the heritability of penicillin MIC is explained by a known drug-resistance region, which also contributes around a quarter of the heritability of ceftriaxone MIC. For the within-host survival phenotype carriage duration, no reliable associations were found but we observed moderate heritability and prediction accuracy, indicating a polygenic trait. While generating important new results for *S. pneumoniae*, we have critically assessed existing methods and introduced innovations that will be useful for future large-scale population genomics studies to help decipher the genetic architecture of bacterial traits.

## Author summary

Genome-wide association, prediction and heritability analyses in bacteria are beginning to help unravel the genetic underpinnings of traits such as antimicrobial resistance, virulence, within-host survival and transmissibility. Progress to date is limited by challenges including the effects of strong population structure and variable

recombination, and the many gaps in sequence alignments including the absence of entire genes in many isolates. More work is required to critically assess and develop methods for bacterial genomics. We address this task here, using a range of existing methods from bacterial and human genetics, such as linear mixed models, elastic net and LD-score regression. We adapt these methods to introduce new analyses, including separate assessment of gap and nucleotide effects, a new allele coding for association analyses and a method to partition heritability into genome regions. We analyse within-host survival and two antimicrobial response traits of *Streptococcus pneumoniae*, identifying many novel associations while demonstrating good control of population structure and accurate prediction. We present both new results for an important pathogen and methodological advances that will be useful in guiding future studies in bacterial population genomics.

## Introduction

The ability to perform genome-wide analyses of DNA variations has enabled detailed investigations of the genetic architecture of traits in many organisms. In human genetics, the study of heritability across the genome has received considerable attention and the main statistical challenges related to robust estimation of SNP heritability are being overcome [1, 2]. Similar studies in bacteria are emerging [3, 4], but the pros and cons of the many available methods have not yet been extensively studied. We adopted popular methods from human genetics, using linear mixed models (LMMs) and linkage disequilibrium score regression (LDSC) to investigate genome-wide association and heritability, in combination with elastic-net regression for prediction of three traits (two not previously studied) in *Streptococcus pneumoniae*.

*S. pneumoniae*, or the pneumococcus, is a Gram-positive human pathogen that can cause several invasive diseases such as pneumonia, meningitis and sepsis, as well as milder diseases such as acute otitis media and tonsillitis. Typically, pneumococci colonise the nasopharynx of a host asymptotically and transmit effectively between young children, who frequently carry the bacterium until they develop broad natural immunity. This may be supplemented by vaccination with any of the polysaccharide conjugate vaccines (PCVs), which induce effective protection against some common

virulent serotypes. Several population genomic studies have characterized central epidemiological traits of the pneumococcus, including duration of carriage and resistance to commonly used antibiotics.

In a pioneering study, Lees et al. [3], found high heritability of the duration of carriage of *S. pneumoniae* in human hosts. Furthermore, the strong genetic control of the binary trait antimicrobial resistance (AMR) is well established from genome-wide association studies (GWAS) [5–8]. The quantitative trait minimum inhibitory concentration (MIC) has previously been studied in *Mycobacterium tuberculosis* [9], but not in *S. pneumoniae*.

We critically assess available methods for association, prediction and heritability analyses, and propose novel developments, which we use to investigate carriage duration (CD), ceftriaxone MIC and penicillin MIC in *S. pneumoniae*, finding many new associations and high predictive accuracy for the two MIC traits. Given the increasing availability of large-scale bacterial GWAS, the developments presented here will provide a useful guide to future studies.

## Materials and methods

### Source of data

The present study is based on nasopharyngeal swab data collected monthly from infants and their mothers in the Maela refugee camp in Thailand between 2007 and 2010 [10]. Overall, 23 910 swabs were collected during the original cohort study, from which 19 359 swabs from 737 infants and 952 mothers were processed according to World Health Organization (WHO) pneumococcal carriage detection protocols [11] and/or the latex sweep method [12].

Penicillin and ceftriaxone susceptibilities were assessed using 1 µg oxacillin disks in accordance with the 2007 CLSI guidelines [13]. Only isolates with an oxacillin zone diameter of <20 mm were subject to benzyl penicillin and ceftriaxone MIC measurements; other isolates were classified as susceptible.

## Preparation of phenotypes

Following [3], we implemented a hidden Markov model, using the R package `msm` [14], to obtain maximum-likelihood estimates of CD values. Due to differences in immune response to bacterial infections between adults and infants [15], only data from infants were used for CD analyses, but we analysed all MIC values regardless of the host. To obtain approximate normal distributions, we log-transformed all three phenotypes (see S1 Fig for histograms).

## Preparation of genetic data

We used a published dataset [5] of high quality genome sequences from 2 663 isolates, manually selected and aligned to the ATCC700669 reference genome using the `snippy` pipeline version 4.4.0 [16], with minimum coverage set at the default 10 reads. Of these, 1 612 isolates were sampled during *S. pneumoniae* positive episodes, on average 1.5 (SD 1.0) isolates per episode. For the 337 episodes represented by > 1 genome sequence, we used the sequence from the last isolate sampled. This resulted in 1 047 sequenced CD episodes in 370 host infants (mean 2.8, SD 1.9 episodes per host). The median CD was 64 days, with mean 110 and SD 102. MIC data for both penicillin (mean 0.57, SD 0.48  $\mu\text{g ml}^{-1}$ ) and ceftriaxone (mean 0.36, SD 0.28  $\mu\text{g ml}^{-1}$ ) were available for 1 332 isolates, of which 554 also have a CD episode. `SNP-sites` version 2.5.1 [17] and `VCFtools` version 0.1.16 [18] were used to identify 239 176 variant sites in the CD dataset, and 215 892 in the MIC dataset.

A gene was considered a part of the core genome if it was observed in  $\geq 95\%$  of isolates, otherwise it was labelled as *accessory*. Pangenome data were extracted by assembling and annotating the read sequences using `Prokka` version 1.14.6 [19]. Orthologous and paralogous gene clusters were then inferred using the `Panaroo` pangenome pipeline version 1.2.4, generating a gene presence/absence matrix [20]. While the core genome was analysed at each variant site, the accessory genome was analysed at the level of genes, using standardised gene counts. The numbers of accessory genes showing variation in the CD and MIC datasets, respectively, were 2 310 and 2 242.

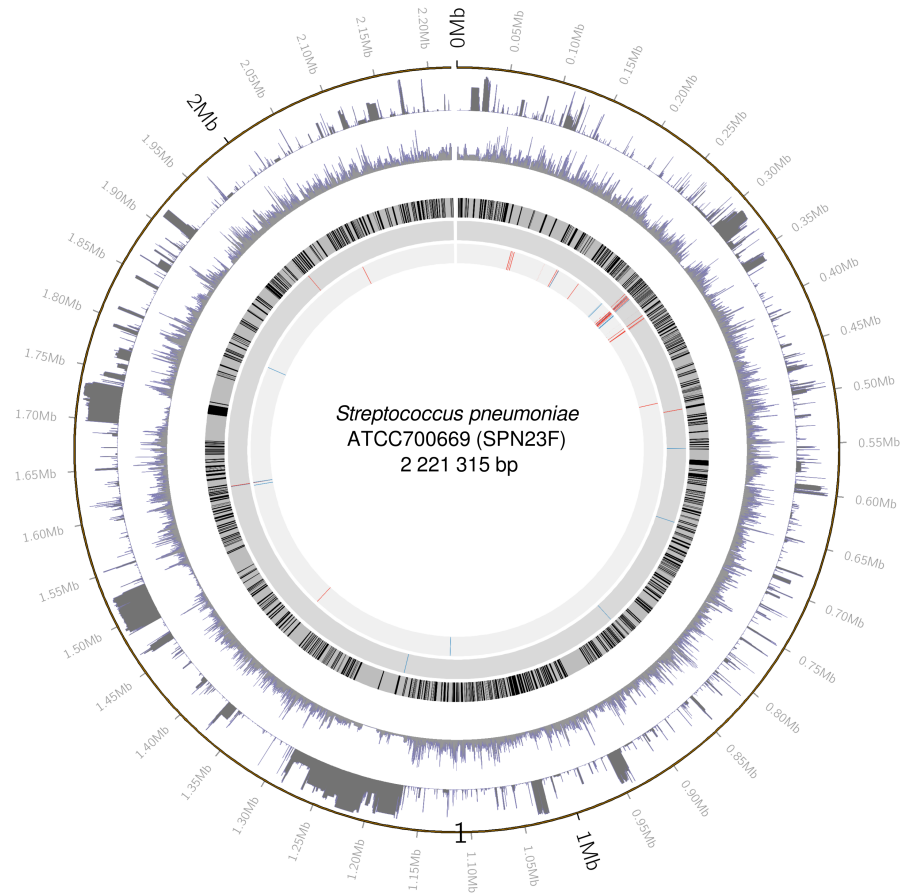

**Fig 1. Mapping of association hits to the ATCC700669 reference genome**  
Working inwards from the outer circle showing basepair positions along the genome, the subsequent circles show the distributions of gap and minor allele frequencies in the MIC dataset, annotated core genes (in black), and SNPs associated with ceftriaxone MIC and penicillin MIC according to the gap test (blue) and SNP test (red). Figure prepared using circos [21].

## Association analyses

74

### Testing gap and SNP effects

75

Five alleles are possible at each variant site, the four nucleotides and gap. Gaps are observed at approximately 71% of variant sites (see Fig. 1 for the gap frequency distribution), while two, three and four nucleotide alleles are observed at 71%, 7% and 0.4% of variant sites, respectively. In human genetics, multi-allelic SNPs and gaps are both rare and SNP alleles are usually coded as binary, leading to three diploid genotypes that can be coded using two degrees of freedom (df), or 1 df under an

81

additive model. For haploid bacteria, a general coding would require up to 4 df per SNP. The usual approach in previous analyses is a 1 df binary coding indicating presence/absence of the major allele. This coding loses information if the minor alleles have different effects. In particular, gap and SNP effects can differ, due in part to different local-dependence effects of insertion/deletion lengths and recombination.

In previous bacterial GWAS analyses, variant sites with many gaps have often been removed. Reasons include that a gap coding can reflect data quality issues other than a true insertion/deletion sequence state, and that the effects of large insertions or deletions cannot be localised to specific sites. However, gaps can harbour causal variation, and it is of interest to identify them, while recognising that the ultimate cause of the association signal may be difficult to decipher. For the core genome variants, we first used a binary gap/non-gap coding to compute a ‘gap test’ statistic at sites with  $\geq 10$  of both gap and non-gap sequences. The test statistic at the  $j$ th variant was the squared standardised effect size:  $b_j^2/\text{Var}(b_j)$ . Next we computed a ‘SNP test’ statistic, omitting gap sequences, at sites with  $\geq 10$  copies of at least two nucleotides. We used a 1 df allele coding equal to the sample frequency of the allele, which assumes that effect sizes vary linearly with allele frequency. For sites with both gap and SNP statistics available, the larger one was used.

To ensure a family-wise error rate (FWER) of 0.05, we performed 500 permutations of the ceftriaxone MIC phenotype, each time re-running the association analysis pipeline and recording the largest test statistic. Our significance threshold for the real-data analyses was 24.8, the 25th largest of the 500 maximum test statistics. In comparison, the corresponding Bonferroni threshold based on 133K tests and a  $\chi_1^2$  null distribution, is 25.8. Therefore, while taking the max of gap and SNP test statistics tends to inflate the null distribution, Bonferroni correction would still be conservative because it ignores the correlations among the statistics. Because of the similarity of the phenotype distributions (S1 Fig), for penicillin MIC we used the permutation threshold derived for ceftriaxone MIC.

For comparison, we also employed a 1 df association test based on presence/absence of the major allele at each variant, whether gap or a nucleotide, using the Bonferroni threshold. While this test allows some gap effects to be detected, if gap is not the major allele it assumes that the gap and minor nucleotide effects are the same. If gap is the

major allele then all nucleotide effects are assumed to be the same. 114

## Population structure, phylogeny and clustering 115

Levels of recombination vary over bacterial species, but in general asexual reproduction 116  
leads to strong population structure, which is challenging for association 117  
analyses [22,23]. Population structure refers to groups of individuals (sub-populations) 118  
with greater genetic similarity among them than with other individuals, which causes 119  
genome-wide genetic correlations that can confound association signals. Sub-populations 120  
may also differ in environmental exposures, which can compound the problem. 121

There is no complete solution to the problems caused by population structure, and 122  
attempts to address them risk discarding true as well as spurious signal. Most 123  
approaches introduce either covariates or a genetic random effect into association 124  
models to absorb signals that can be explained by population structure, which then do 125  
not contribute to association statistics. The variance-covariance matrix  $\mathbf{G}$  of a genetic 126  
random effect is assumed known *a priori* based on measures of similarity between pairs 127  
of sequences. 128

Sequence clusters can be used to define either  $\mathbf{G}$ , via cluster distances, or population 129  
structure covariates via indicators of cluster membership. Clustering can proceed by 130  
constructing a phylogenetic tree that models the evolutionary history of the 131  
sequences [24], with nodes of the tree used as cluster identifiers and branch lengths used 132  
to define cluster distances. We inferred maximum-likelihood phylogenies of both CD 133  
and MIC datasets using IQTree version 2.0.6 [25] under the general time reversible 134  
model, with discrete Gamma (+G option) base substitution rates across sites (Fig. 2). 135  
The model assumes no recombination, which is false for *S. pneumoniae*, and 136  
consequently the usefulness of the resulting phylogeny has been questioned [26]. 137

FastBAPS, which extends hierBAPS, [30–32] was also used to cluster the isolates, 138  
without reference to a phylogeny. This approach generates an initial clustering using 139  
between-variant pairwise distances based on Ward’s method [33], then an optimal set of 140  
clusters is identified using Bayesian hierarchical clustering [34]. 141

In human studies,  $\mathbf{G}$  was in the past computed from known pedigrees [35] and now 142  
usually as a genome-wide average allelic correlation [36]. For bacteria,  $\mathbf{G}$  can be defined 143  
using allelic correlations under any 1 df allele coding. Despite the success of this 144



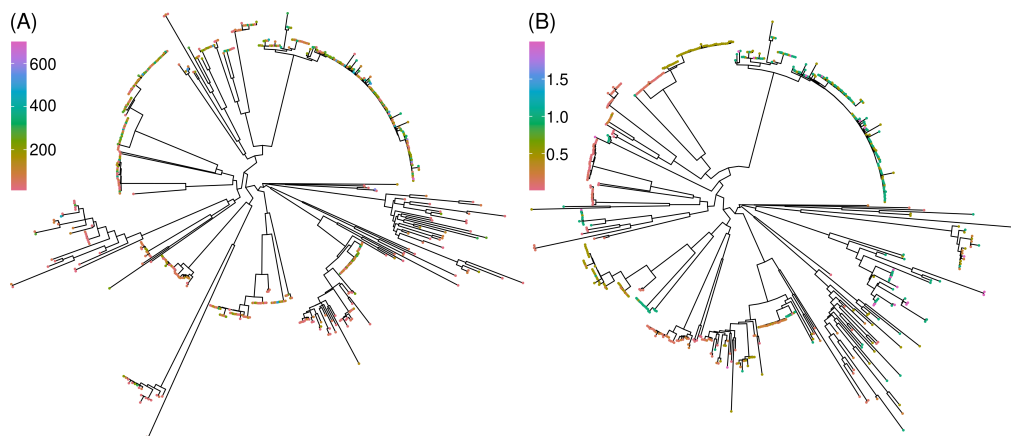

**Fig 2. Phylogenies inferred using IQtree2** (A) 1 047 isolates with a carriage duration (CD) phenotype, indicated by tip colour (in days). (B) 1 332 isolates with MIC phenotypes, with the penicillin phenotype indicated by tip colour (in  $\mu\text{g ml}^{-1}$ ). Plots generated after midpoint rooting using R packages ape [27], phytools [28] and ggtree [29].

approach in human studies, our preliminary analyses could not identify an allele coding 145  
that led to good control of population structure effects, although using the gap 146  
presence/absence binary indicator gave the best results among those we tried. 147  
Conversely, despite the questionable validity of the phylogeny due to it ignoring 148  
recombination, defining  $\mathbf{G}$  in terms of lengths of shared phylogenetic branches [37] led 149  
to good control of population structure, as evidenced by QQ plots. 150

### Linear mixed model (LMM) analyses 151

We wish to test  $b_j = 0$  within the LMM [38]: 152

$$\mathbf{y} = b_j \mathbf{x}_j + \mathbf{u} + \epsilon, \quad \mathbf{u} \sim \mathcal{N}(0, \sigma_g^2 \mathbf{G}), \quad \epsilon \sim \mathcal{N}(0, \sigma_e^2 \mathbf{I}), \quad (1)$$

where  $\mathbf{y}$  is a length- $n$  phenotype vector,  $\mathbf{x}_j$  is the vector encoding alleles at the  $j$ th 153  
variant, and  $\mathbf{u}$  and  $\epsilon$  are random vectors of genetic and environmental effects, with  $\mathbf{I}$  the 154  
 $n \times n$  identity matrix. 155

Pyseer [39] has recently been widely used in bacterial GWAS, and an extensive 156  
summary of its models with performance benchmarking is available [40]. The Pyseer 157  
implementation of (1) is based on FaST-LMM [41], and includes likelihood ratio testing 158  
of  $b_j = 0$ . It requires binary coding of genetic variants, and so can be used for the gap 159  
and major-allele tests, but it cannot accommodate the frequency-coding or omission of 160

the gap sequences at each SNP test. To overcome this problem, we used a two-stage LMM/GLS pipeline for the SNP test, similar to EMMAX [42], in which the phenotype for association testing was the residual from fitting (1) with  $b_j = 0$ . This first ‘LMM’ stage was performed using lme4qtl [35]. The  $b_j$  were then estimated in a second stage using generalised least squares regression (GLS). In the CD analyses for the SNP test, we were able to incorporate an extra random effect to model shared host in the LMM/GLS pipeline, but for the gap and major-allele tests performed using Pyseer-LMM, this was replaced by a binary covariate indicating previous carriage.

Accessory genome genes were tested using the LMM/GLS pipeline, with a single test based on standardised gene counts.

### Phylogenetic method treeWAS

For comparison, we also implemented the phylogeny-based treeWAS [43] using the major-allele coding. Use of a single phylogeny in treeWAS corresponds to an assumption of negligible recombination. As recommended for recombinant species such as *S. pneumoniae* [43], we first implemented the ClonalFrameML pipeline (see S2 Fig) [44]. Then treeWAS infers the ancestral phenotype and genotype states at each internal node of the phylogeny, before computing three association test statistics:

1. **Terminal Score:** measures sample-wide phenotype-genotype associations between leaves of the phylogeny.
2. **Simultaneous Score:** measures parallel changes in both phenotype and genotype on phylogeny branches.
3. **Subsequent Score:** measures the proportion of the tree within which genotype and phenotype ‘co-exist’. It is equivalent to integrating association scores over all tree nodes.

For each test, a significance threshold is estimated from null simulations of genetic data at 10 times as many sites as the observed dataset.

## Phenotype prediction: whole genome elastic net (wg-enet) 187

The Pyseer wg-enet prediction model is based on glmnet [45]. To bypass the Pyseer 188  
requirement for binary-coded variants, we set up the wg-enet model in glmnet to use a 189  
frequency-based allele coding as in the SNP test except that gaps were counted as an 190  
allele in this coding. Following Pyseer guidelines [46], we omitted 25% of variants with 191  
the largest association  $p$ -values, and then removed highly-correlated variants at a 0.75 192  
threshold. We verified the finding of [46] that prediction accuracy is improved using 193  
weight  $w_i$  for the  $i$ th isolate, where  $w_i$  is proportional to the inverse of the size of the 194  
cluster that includes the isolate, and  $\sum_i w_i = n$ . After centering the phenotype values 195  
to have mean zero, the  $i$ th phenotype value is predicted by  $\hat{\mathbf{b}}^T \mathbf{x}_i$ , where  $\mathbf{x}_i$  is the vector 196  
of allele indicators for the  $i$ th sequence, and 197

$$\hat{\mathbf{b}} = \underset{\mathbf{b}}{\operatorname{argmin}} \lambda \left[ \frac{1-\alpha}{2} \|\mathbf{b}\|_2^2 + \alpha \|\mathbf{b}\|_1 \right] + \frac{1}{n} \sum_{i=1}^n w_i (y_i - \mathbf{b}^T \mathbf{x}_i)^2. \quad (2)$$

We use cross-validation (CV) to optimise  $\lambda$ , which controls the penalty on large  $\mathbf{b}$  values. 198  
When  $\lambda = 0$  we have weighted least-squares regression, while increasing  $\lambda$  introduces 199  
bias to reduce overfitting. By default, both Pyseer and our pipeline set  $\alpha = 0.01$ . 200  
Although this value is close to that for ridge regression ( $\alpha = 0$ ), which retains all 201  
predictors in the model, it is large enough that only about 10% of  $\hat{\mathbf{b}}$  entries are non-zero. 202

Ten-fold (10F) and leave-one-strain-out (LOSO) [46] CV were used to assess 203  
prediction accuracy. Whereas 10F selects the training sets randomly, which can lead to 204  
instances of high similarity between test and training sequences, LOSO is a more 205  
challenging prediction task where an entire strain (= FastBAPS cluster) is predicted 206  
after training on the other strains. 207

## Estimation of heritability 208

Genetic effects at different genome sites can interact (epistasis), but we restrict 209  
attention to the narrow-sense heritability  $h^2$ , with  $\sigma_g^2$  assumed to be a sum of 210  
contributions from individual sites. The LMM estimates  $h^2 = \sigma_g^2 / (\sigma_g^2 + \sigma_e^2)$  [39]. For 211  
the wg-enet heritability estimation, we used  $\alpha = 0$  (ridge regression). Then  $\hat{h}^2 = R^2$ , 212  
the proportion of phenotype variance explained by the model [46]. 213

We also estimate  $h^2$  using a modification of the LDSC model [47]:

$$\mathbb{E}[S_j] \approx A + \frac{n-1}{m} h_g^2 l_j \quad \text{where} \quad l_j = \sum_{k=1}^m \frac{(n-1)r_{jk}^2 - 1}{n-2}. \quad (3)$$

Here,  $S_j$  is the association test statistic at variant  $j$ , and  $r_{jk}$  is the sample correlation of frequency-based allele codes at variants  $j$  and  $k$  (or gene counts for the accessory genome). Following [48], prior to computing pairwise Pearson correlation coefficients we further transformed the allele codes using Gaussian quantile normalisation.

The score  $l_j$  involves a sum over the whole genome. In human genetics applications only a neighbourhood of  $j$  is included, but the presence of genome-wide LD in *S. pneumoniae* makes it difficult to define a suitable neighbourhood. The definition of  $l_j$  also incorporates a bias adjustment [47] that can lead to  $l_j < 0$ , but typically  $l_j \gg 1$ . To account for heteroskedasticity and correlations among the  $S_j$ , the least-squares estimation of  $A$  and  $h_g^2$  in (3) used weights  $1/\max(1, l_j)$ .

When choosing the testing method to generate the  $S_j$  for LDSC, we found that the very strong population structure effects distort the LDSC regression relationship in the absence of any adjustment, yet a fully effective adjustment for population structure was also unsatisfactory because it removed informative signal. The best compromise that we could identify between inadequate control for population structure effects and loss of association signal with effective control, was to compute the major-allele test statistic  $S_j$  in the fixed effect model (FEM):

$$\mathbf{y} = \mathbf{v}a + \mathbf{x}_j b_j + \epsilon, \quad (4)$$

where  $\mathbf{v}$  is the first principal component (PC) of the sequence distances (explaining  $> 90\%$  of genetic variation) and  $a$  is the corresponding effect size. For the CD analyses, we also included the previous carriage covariate in (4). We note again that  $\mathbf{v}$  does not remove all population structure effects and the  $S_j$  tend to be inflated, but this is not important for LDSC estimation of  $h_g^2$  which uses the slope of the relationship of  $l_j$  with  $S_j$ . Because of inadequate control of population structure using all approaches that we attempted, which included FastBAPS cluster membership indicators and additional principal components (PC), we do not report association results based on this FEM and

only use the  $S_j$  obtained under this model within LDSC. 239

As well as estimating genome-wide  $h_g^2$ , LDSC is useful for estimating the 240  
contributions to  $h_g^2$  from specified genome regions. This is challenging because simply 241  
omitting variants from a heritability analysis may not exclude their effects due to strong 242  
and long range LD. For the MIC phenotypes, we computed  $\hat{h}^2$  in (3) omitting effects 243  
from a known drug resistance genome region that includes the important 244  
penicillin-binding genes *pbp1a* and *pbp2x*. We first identified a set of large effect-size 245  
variants with basepair positions between 285 000 and 340 000 by clumping the 246  
frequency-coded variants using correlation threshold 0.85. These variants were used as 247  
fixed covariates when re-calculating the  $S_j$  for this analysis, which prevents tagging of 248  
effects from the omitted region. 249

## Code and data availability 250

Code is available at <https://github.com/Sudaraka88/bacterial-heritability> and 251  
access details for the genetic data are provided in S1 File. 252

## Results 253

### Carriage duration (CD) 254

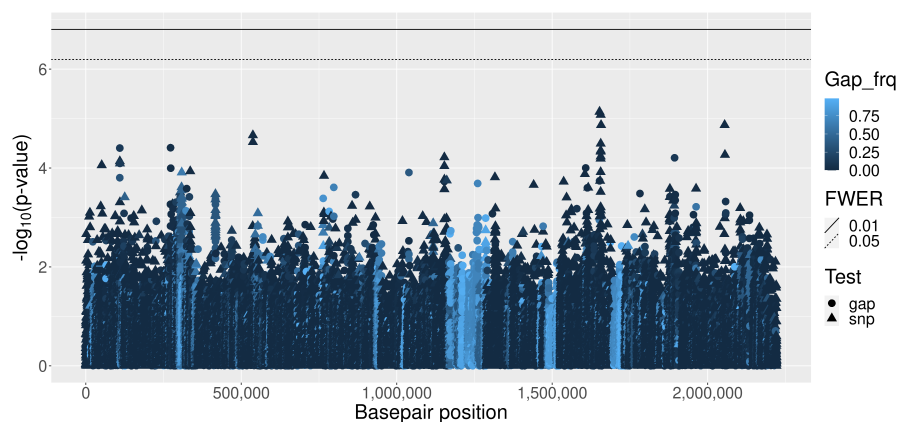

**Fig 3. Carriage duration (CD) Manhattan plot for core genome variants.** Accessory genes are not shown. See legend for shading that indicates gap frequency and symbol shape indicating gap or SNP test. Basepair positions are obtained from the ATCC700669 reference genome alignment.

None of the 2310 tested accessory genes were associated with CD. Similarly there 255

were no genome-wide significant results among the 44 097 gap and 91 822 SNP tests at 256  
 core genome variants (Fig. 3). The shared-host random effect explained 1.4% of 257  
 variance for CD, and  $R^2 = 0.0022$  for the previous carriage fixed effect ( $\beta = -0.097$ , SE 258  
 $= 0.026$ ). The QQ-plot (S3 Fig) indicates some inflation of test statistics suggestive of 259  
 population structure effects (genome inflation factor, GIF = 1.44). The LMM 260  
 major-allele test also identified no associations (GIF = 1.22, S4 Fig) and treeWAS 261  
 identified 3 hits in 2 genes: *purF* and *polA* (S5 Fig). 262

Despite the lack of associations for CD, prediction accuracy (Table 1) and 263  
 heritability estimates (Table 2) are significantly above zero, suggesting a polygenic trait. 264  
 As expected, LOSO prediction is less accurate than 10F CV. Pangenome estimates from 265  
 wg-enet, LMM and LDSC are similar ( $0.32 \leq \hat{h}^2 \leq 0.34$ ) with all methods also agreeing 266  
 on a negligible contribution to  $h^2$  from the accessory genome. LDSC analyses also 267  
 confirmed only a small contribution to  $h^2$  from the known drug-resistance region (see S6 268  
 Fig for LDSC plots). Furthermore, phenotype prediction with allele frequency-based 269  
 coding of variants slightly outperformed major allele coding (S2 Appendix and S7 Fig). 270

**Table 1. Phenotype prediction.** Mean squared error (MSE) and the correlation between observed and predicted test values using 10-fold (10F) and leave-one-strain-out (LOSO) cross validation (CV). Predictions were performed using a wg-enet model ( $\alpha = 0.01$ ) in glmnet, with frequency-based allele coding (all five alleles coded according to their frequency). Approximately 2% of available predictors were used for CD and 1% were used for the two MIC phenotypes. For corresponding results from major-allele coded variants, see S2 Appendix.

| Phenotype<br>(log scale) | 10F CV       |              | LOSO CV      |              |
|--------------------------|--------------|--------------|--------------|--------------|
|                          | MSE (SE)     | Cor (SE)     | MSE (SE)     | Cor (SE)     |
| CD                       | 0.10 (0.004) | 0.55 (0.022) | 0.12 (0.005) | 0.44 (0.025) |
| Ceftriaxone MIC          | 0.03 (0.002) | 0.91 (0.005) | 0.08 (0.003) | 0.77 (0.005) |
| Penicillin MIC           | 0.04 (0.003) | 0.91 (0.005) | 0.13 (0.051) | 0.69 (0.014) |

**Table 2. Heritability estimates ( $\hat{h}^2$ ).** The upper and lower values in each cell are for core genome and pangenome (= core genome plus accessory genes). Under “w/o DR” are results from analyses that omit effects from a genome region that is known to be associated with drug resistance.

| Phenotype                   | LDSC |        |      |      |
|-----------------------------|------|--------|------|------|
|                             | wg   | w/o DR | enet | LMM  |
| CD                          | 0.34 | 0.30   | 0.34 | 0.32 |
| <i>with</i> accessory genes | 0.34 | 0.31   | 0.34 | 0.32 |
| Ceftriaxone MIC             | 0.86 | 0.22   | 0.92 | 0.98 |
| <i>with</i> accessory genes | 0.87 | 0.22   | 0.93 | 0.98 |
| Penicillin MIC              | 0.72 | 0.40   | 0.94 | 0.98 |
| <i>with</i> accessory genes | 0.72 | 0.41   | 0.94 | 0.98 |

We also performed association testing on all 1 612 isolates linked to a carriage 271  
episode. This analysis identified four sites at basepair positions 1 522 542–1 522 896, near 272  
the previously-reported phage hit based on *k*-mer analysis [46]. However, our 4 hits are 273  
due to the same 15 isolates, of which 6 are from the same long (517 day) episode (see 274  
detailed results in S1 Appendix). Furthermore, when the all-isolates dataset was 275  
analysed using treeWAS, 9 associations were identified (see S3 Appendix), but these did 276  
not include *purF* and *polA* (reported above) nor the region identified in our LMM 277  
analyses. We conclude that we are unable to reliably identify individual associations for 278  
CD, but there is good evidence for it being a moderately-heritable polygenic trait. 279

## Minimum inhibitory concentration (MIC) phenotypes 280

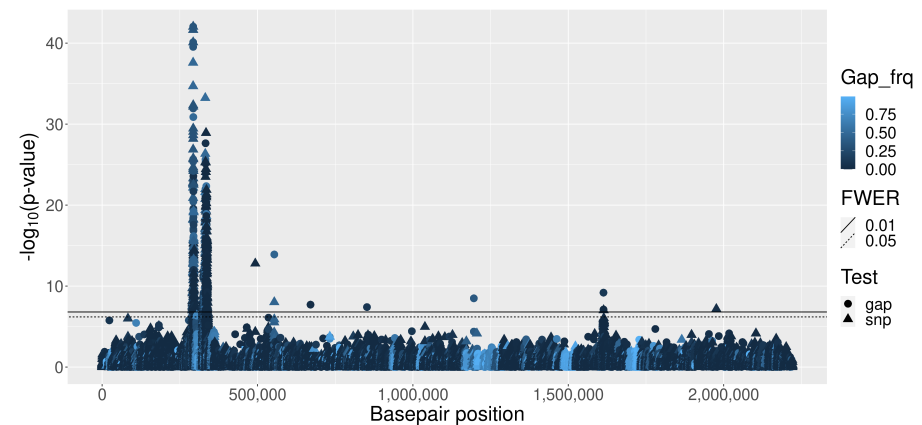

**Fig 4. Ceftriaxone MIC Manhattan plot.** The shading and symbol shapes (see legend) are the same as for Fig. 3

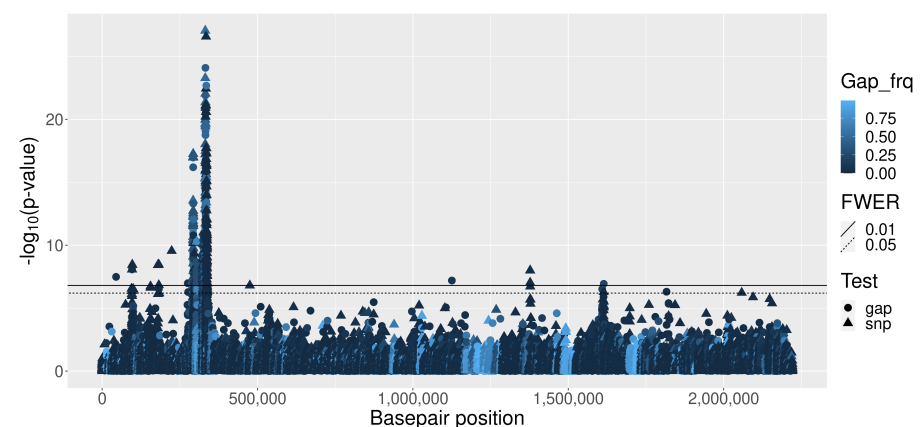

**Fig 5. Penicillin MIC Manhattan plot.** See Fig. 4 caption for details.

For both MIC phenotypes, from the 2 242 accessory genes tested, one (with Panaroo 281

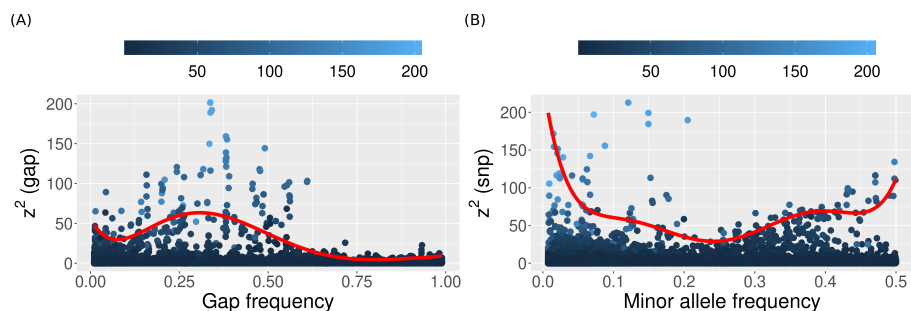

**Fig 6. Association test statistics against variant frequency for ceftriaxone MIC.** Each point shows the  $z^2$  statistic from (A) gap and (B) SNP test at a core genome variant. The  $x$ -axis shows frequencies of (A) gap and (B) minor nucleotide as a fraction of all nucleotides. Points are shaded according to the major-allele test statistic and the red curve shows 7<sup>th</sup> order regression fit for the 90<sup>th</sup> percentile [50]. See S8 Fig for this analysis on the other two phenotypes.

label group\_102) showed genome-wide significant association. Gap and SNP tests were performed at 36 020 and 97 224 core genome sites, respectively. For ceftriaxone MIC and penicillin MIC, respectively, 998 and 833 variants showed genome-wide significance (Figs 4, 5), and 688 and 504 of these were within annotated gene regions of the ATCC700669 reference genome [49] (Table 3). Approximately 35% of hits were from the gap test, associations that have largely been ignored in previous analyses. For ceftriaxone MIC and penicillin MIC, GIF = 1.14 and 1.28 respectively, but the QQ plots (S9 Fig) suggest that, rather than genome-wide inflation caused by population structure, GIF > 1 is due to a large fraction of the genome showing causal association with these highly-heritable, polygenic traits.

**Table 3. Genes showing significant association with MIC phenotypes.**

| Phenotype (log)     | Core genes                                                     | Acc. gene |
|---------------------|----------------------------------------------------------------|-----------|
| Ceftriaxone only    | mraW, clpL, csrR, rplK, aliB, plr, valS                        |           |
| Both MIC phenotypes | pbp1a, aliA, pbp2x, mraY, recU, gnd, dexB, luxS, wzg, pbp2b    | group_102 |
| Penicillin only     | aliB, clpL, wzd, wzh, blpY, galK, hasC, leuB, leuS, murF, recO |           |

For ceftriaxone MIC, the largest statistics are of similar magnitude for gap and SNP tests (Fig. 6), but for low allele frequencies there are few large gap statistics and many large SNP statistics, suggesting that there are few rare deletions, but many rare nucleotides of large effect. There are also few large gap statistics with frequency > 0.6, suggesting few sequence insertions of large effect. Many large SNP statistics with frequency above 0.4 were not recorded as significant under the major-allele test, which



may reflect a benefit of frequency-based allele coding. 298

In comparison, the major-allele LMM test identified 817 core-variant associations for 299  
ceftriaxone MIC (S10 Fig), 524 of which were in 22 genes, 13 of them also identified by 300  
the gap/SNP test. For penicillin MIC (S11 Fig), 602 associations were identified, 444 of 301  
which were mapped to 16 genes, also 13 in common with the gap/SNP test. No 302  
accessory gene associations were identified for either MIC phenotype. Overall the 303  
gap/SNP test performed better than the major-allele LMM test, identifying more 304  
associations (1 831 vs 1 419) with lower GIF (1.14 vs 1.20 and 1.28 vs 1.56). 305

treeWAS identified 140 and 66 core-genome associations (S12 Fig, S13 Fig), in both 306  
cases implicating the same four genes (S3 Appendix), a subset of those in Table 3. 307

As expected from the large number of associations, prediction accuracy for both 308  
MIC phenotypes is very high under 10F CV (Table 1), but less so for LOSO CV, with 309  
high SE values for penicillin MIC indicating hard-to-predict clusters (S14 Fig). 310

The LMM and wg-enet  $\hat{h}^2$  agree closely across the two MIC phenotypes. The 311  
wg-enet values are about 5% lower (Table 2), but they are higher than previously 312  
reported for binary AMR [4]. The LDSC  $\hat{h}^2$  are lower again, and this was the only 313  
method to report a difference  $\hat{h}^2$  between the two MIC traits, consistent with lower 314  
LOSO prediction accuracy, and also lower numbers and significance of associations, for 315  
penicillin MIC compared with ceftriaxone MIC. Using LDSC we also estimate that just 316  
over half of  $h^2$  for penicillin MIC can be attributed to the known drug resistance region, 317  
which represents only 2.5% of the core genome, whereas the fraction of  $h^2$  falls to 318  
around a quarter for ceftriaxone MIC (see S6 Fig for LDSC plots). 319

## Discussion 320

We have investigated methods for association, prediction and heritability analyses for 321  
quantitative bacterial traits, and identified several improvements over previous 322  
approaches. We used multiple methods to perform genomic analyses of *S. pneumoniae* 323  
minimum inhibitory concentration (MIC) for the beta-lactam antibiotics ceftriaxone 324  
and penicillin, finding many novel associations and high heritability. Prediction of MIC 325  
traits was correspondingly accurate under 10F CV. 326

The genome regions identified as associated with the MIC phenotypes overlap those 327

previously reported for the binary AMR phenotypes, even in the case of ceftriaxone for which none of the tested isolates was resistant. Many of the associated genes are in the peptidoglycan biosynthesis pathway, including penicillin binding proteins (PBPs: *pbp1a*, *pbp2b*, *pbp2x*) and transferases required for cell wall biogenesis (*mraY* and *mraW* for ceftriaxone MIC). A single heat shock protein (*clpL*) and a gene from the recombination pathway (*recU*) were also identified as associated. When present, the group\_102 accessory gene is located adjacent to *pbp1a*, which generates an enzyme involved in cell wall remodelling, which may contribute to the association signal for the MIC phenotypes. However, most of the genes identified for the MIC phenotypes are in tight linkage with the three PBPs and may not represent independent effects.

We found no reliable associations for *S. pneumoniae* carriage duration (CD), but strong evidence that it is a polygenic trait of moderate heritability ( $\hat{h}^2 \approx 0.33$ ) that is predictable from the genome sequence (0.55 and 0.44 correlation between predicted and true phenotype under 10F and LOSO CV, respectively).

The innovations in our association analysis pipeline include separate testing of gap and SNP effects, with a permutation approach to control FWER and frequency-based allele coding. This approach performed better than the alternatives of major-allele LMM and treeWAS tests, detecting more associations under good control of population structure effects.

Our phenotype prediction analysis used frequency-coded variants within a glmnet-based whole genome elastic net model.

The previous analysis on CD using data from the same study [3], provided a lower-bound  $h^2$  estimate of 0.45 using warped-lmm [51], concluding that CD is a highly heritable trait. Our estimates are lower, which may be due to our use of only one isolate per CD episode (S1 Appendix).

Penicillin AMR  $\hat{h}^2$  in the Maela data set was recently reported in the range 0.67–0.83 [4]. We find even higher values for the quantitative penicillin MIC phenotype using LMM and wg-enet methods: 0.94–0.98 (Table 2), however, the LDSC  $\hat{h}^2 = 0.72$  (S6 Fig) is within the range of the AMR estimates and in better agreement with the LOSO prediction results (Table 1). For ceftriaxone MIC, all three methods estimate  $h^2$  in the range 0.86–0.98, consistent with the good prediction performance.

The reduction in  $h^2$  for penicillin MIC by more than half on removing known drug

resistance genome regions in *S. pneumoniae* contrasts with results from *M. tuberculosis*,  
where the largest reduction in  $h^2$  (measured using GEMMA [52]) was only 27% [9],  
which is close to our result for ceftriaxone MIC.

Our results support the use of linear mixed models for association analysis, with  
separate testing of gap and SNP effects, the latter using frequency-based allele coding.  
We also support the use of wg-enet for prediction of quantitative traits and we find that  
LDSC performs well for heritability analyses but further work is required to assess  
optimal strategies for dealing with strong population structure in bacterial genomes.

## Supporting information

**S1 Appendix. Results from the carriage duration analysis using the  
dataset comprising all 1612 isolates sampled during a positive episode.**

(PDF)

**S2 Appendix. Phenotype prediction using major allele frequency coded  
variants.**

(PDF)

**S3 Appendix. Genes identified with major allele tests.**

(PDF)

**S1 Fig. Phenotype distribution.** Top and bottom rows show the distribution of  
the three phenotypes before and after  $\log_{10}$  transformation.

**S2 Fig. Phylogenetic trees from the ClonalFrameML analysis.** Mid-point  
rooted, ‘recombination-aware’ tree structure for (A) 1047 isolates with carriage duration  
phenotype (measured in days and indicated by tip colour) and (B) 1332 isolates with  
MIC phenotype (measured in  $\mu\text{g ml}^{-1}$  and tip colour indicates the distribution of  
penicillin MIC).

(PDF)

**S3 Fig. QQ plot for carriage duration from the GAP/SNP analysis.**

(PDF)

**S4 Fig. Manhattan plot from major-allele tests of association with CD.** 387

Testing was performed with (A) LMM and (B) FEM models. LMM did not identify any 388  
significant associations, whereas FEM identified 92 associations with  $GIF = 2.53$ , 389  
indicating genome-wide inflation due to unsatisfactory control of population structure. 390  
In FEM, population structure correction was performed using FastBAPS cluster 391  
indicator covariates. Point colour indicates the gap frequency at each site and the 392  
horizontal lines indicate Bonferroni corrected significance thresholds. 393

(PDF) 394

**S5 Fig. treeWAS analysis for CD.** Manhattan plots for (top) Terminal (middle) 395

Simultaneous and (bottom) Subsequent scores are shown, where three hits are identified 396  
from the simultaneous test. 397

(PDF) 398

**S6 Fig. LDSC analyses for all phenotypes.** LDSC plots for (A) CD, (B) 399

ceftriaxone MIC and (C) penicillin MIC. In each figure, subplots correspond to the **a.** 400  
core genome **b.** pangenome **c.** core genome w/o DR and **d.** pangenome w/o DR 401  
analyses and the  $\hat{h}^2$  are reported in Table 2. 402

(PDF) 403

**S7 Fig. Prediction accuracy with major allele and frequency coding.** Allele 404

frequency coding generally increases the correlation and reduces the mean squared error 405  
of prediction for all three phenotypes across folds and clusters. Note that the Mean 406  
squared error and correlation values here are averaged across folds and clusters, and are 407  
different from the overall accuracy results in Table 1 and S2 Appendix 408

(PDF) 409

**S8 Fig. Variation in  $z^2$  statistics with variant frequency** Each point shows the 410

$z^2$  statistic of a (A, C) gap and (B, D) SNP tested core genome variants for (A, B) 411  
carriage duration and (C, D) penicillin MIC. The  $x$ -axis respectively shows the gap and 412  
minor allele frequency for gap and SNP tested variants. Points are shaded according to 413  
the  $z^2$  statistic from the major allele test and the red curve shows the 4<sup>th</sup> order 414  
regression fit for the 90<sup>th</sup> percentile of data. 415

(PDF) 416

**S9 Fig. QQ plots for MIC phenotypes from the GAP/SNP analysis.** (A) 417  
ceftriaxone MIC (B) penicillin MIC. 418

(PDF) 419

**S10 Fig. Major-allele test for ceftriaxone MIC.** Testing was performed using 420  
(A) LMM and (B) FEM models. FEM analysis identified 13 212 hits with GIF = 16.4. 421  
See caption in S4 Fig for additional analysis and figure legend details. 422

(PDF) 423

**S11 Fig. Major-allele test for penicillin MIC.** Testing was performed using (A) 424  
LMM and (B) FEM models. FEM analysis identified 23 636 hits with GIF = 17.0. See 425  
caption in S4 Fig for additional analysis and figure legend details. 426

(PDF) 427

**S12 Fig. treeWAS analysis for ceftriaxone MIC.** Manhattan plots for (top) 428  
Terminal (middle) Simultaneous and (bottom) Subsequent scores. 429

(PDF) 430

**S13 Fig. treeWAS analysis for penicillin MIC.** Manhattan plots for (top) 431  
Terminal (middle) Simultaneous and (bottom) Subsequent scores. 432

(PDF) 433

**S14 Fig. Prediction performance.** Prediction performance of (A,B) carriage 434  
duration, (C,D) ceftriaxone MIC and (E,F) penicillin MIC phenotypes, assessed using 435  
(A,C,E) 10F and (B,D,F) LOSO CV. The  $x$  and  $y$  axes denote the true and predicted 436  
values, respectively and point colour represents the fold or FastBAPS cluster. Mean 437  
squared error and correlation values in Table 1 and S2 Appendix are computed using all 438  
values shown here. 439

(PDF) 440

**S1 File. Metadata for *S. pneumoniae* isolate reads used in this study.** 441

(CSV) 442

## Acknowledgments

SM and DB were supported by grant DP190103188 from the Australian Research Council. JC was funded by the ERC grant no. 742158.

## References

1. Speed D, Balding DJ. SumHer better estimates the SNP heritability of complex traits from summary statistics. *Nature genetics*. 2019;51(2):277–284.
2. Speed D, Holmes J, Balding DJ. Evaluating and improving heritability models using summary statistics. *Nature Genetics*. 2020;52(4):458–462.
3. Lees JA, Croucher NJ, Goldblatt D, Nosten F, Parkhill J, Turner C, et al. Genome-wide identification of lineage and locus specific variation associated with pneumococcal carriage duration. *Elife*. 2017;6:e26255.
4. Mai TT, Turner P, Corander J. Boosting heritability: estimating the genetic component of phenotypic variation with multiple sample splitting. *BMC bioinformatics*. 2021;22(1):1–16.
5. Chewapreecha C, Harris SR, Croucher NJ, Turner C, Marttinen P, Cheng L, et al. Dense genomic sampling identifies highways of pneumococcal recombination. *Nature genetics*. 2014;46(3):305–309.
6. Chewapreecha C, Marttinen P, Croucher NJ, Salter SJ, Harris SR, Mather AE, et al. Comprehensive identification of single nucleotide polymorphisms associated with beta-lactam resistance within pneumococcal mosaic genes. *PLoS Genet*. 2014;10(8):e1004547.
7. Mobegi FM, Cremers AJ, De Jonge MI, Bentley SD, Van Hijum SA, Zomer A. Deciphering the distance to antibiotic resistance for the pneumococcus using genome sequencing data. *Scientific reports*. 2017;7(1):1–13.
8. Skwark MJ, Croucher NJ, Puranen S, Chewapreecha C, Pesonen M, Xu YY, et al. Interacting networks of resistance, virulence and core machinery genes identified by genome-wide epistasis analysis. *PLoS genetics*. 2017;13(2):e1006508.

9. Farhat MR, Freschi L, Calderon R, Ioerger T, Snyder M, Meehan CJ, et al. GWAS for quantitative resistance phenotypes in *Mycobacterium tuberculosis* reveals resistance genes and regulatory regions. *Nature communications*. 2019;10(1):1–11.
10. Turner P, Turner C, Jankhot A, Helen N, Lee SJ, Day NP, et al. A longitudinal study of *Streptococcus pneumoniae* carriage in a cohort of infants and their mothers on the Thailand-Myanmar border. *PloS one*. 2012;7(5).
11. O'Brien KL, Nohynek H, World Health Organization Pneumococcal Vaccine Trials Carriage Working Group. Report from a WHO Working Group: standard method for detecting upper respiratory carriage of *Streptococcus pneumoniae*. *Pediatr Infect Dis J*. 2003;22(2):e1–11. doi:10.1097/01.inf.0000049347.42983.77.
12. Turner P, Turner C, Jankhot A, Phakaudom K, Nosten F, Goldblatt D. Field evaluation of culture plus latex sweep serotyping for detection of multiple pneumococcal serotype colonisation in infants and young children. *PLoS One*. 2013;8(7):e67933. doi:10.1371/journal.pone.0067933.
13. Clinical, Institute LS. Performance standards for antimicrobial susceptibility testing; 2017.
14. Jackson CH, et al. Multi-state models for panel data: the msm package for R. *Journal of statistical software*. 2011;38(8):1–29.
15. Maródi L. Neonatal innate immunity to infectious agents. *Infection and immunity*. 2006;74(4):1999–2006.
16. Seemann T. Snippy: rapid haplotype variant calling and core genome alignment; 2020.
17. Page AJ, Taylor B, Delaney AJ, Soares J, Seemann T, Keane JA, et al. SNP-sites: rapid efficient extraction of SNPs from multi-FASTA alignments. *Microbial genomics*. 2016;2(4).
18. Danecek P, Auton A, Abecasis G, Albers CA, Banks E, DePristo MA, et al. The variant call format and VCFtools. *Bioinformatics*. 2011;27(15):2156–2158.

19. Seemann T. Prokka: rapid prokaryotic genome annotation. *Bioinformatics*. 2014;30(14):2068–2069.
20. Tonkin-Hill G, MacAlasdair N, Ruis C, Weimann A, Horesh G, Lees JA, et al. Producing polished prokaryotic pangenomes with the Panaroo pipeline. *Genome biology*. 2020;21(1):1–21.
21. Krzywinski M, Schein J, Birol I, Connors J, Gascoyne R, Horsman D, et al. Circos: an information aesthetic for comparative genomics. *Genome research*. 2009;19(9):1639–1645.
22. Corander J, Croucher NJ, Harris SR, Lees JA, Tonkin-Hill G. 36. In: *Bacterial Population Genomics*. John Wiley & Sons, Ltd; 2019. p. 997–1020. Available from: <https://onlinelibrary.wiley.com/doi/abs/10.1002/9781119487845.ch36>.
23. Chen PE, Shapiro BJ. The advent of genome-wide association studies for bacteria. *Current opinion in microbiology*. 2015;25:17–24.
24. Earle SG, Wu CH, Charlesworth J, Stoesser N, Gordon NC, Walker TM, et al. Identifying lineage effects when controlling for population structure improves power in bacterial association studies. *Nature microbiology*. 2016;1(5):1–8.
25. Minh BQ, Schmidt HA, Chernomor O, Schrempf D, Woodhams MD, Von Haeseler A, et al. IQ-TREE 2: New models and efficient methods for phylogenetic inference in the genomic era. *Molecular Biology and Evolution*. 2020;37(5):1530–1534.
26. Sakoparnig T, Field C, van Nimwegen E. Whole genome phylogenies reflect the distributions of recombination rates for many bacterial species. *eLife*. 2021;10:e65366. doi:10.7554/eLife.65366.
27. Paradis E, Schliep K. ape 5.0: an environment for modern phylogenetics and evolutionary analyses in R. *Bioinformatics*. 2019;35(3):526–528.
28. Revell LJ. phytools: an R package for phylogenetic comparative biology (and other things). *Methods in ecology and evolution*. 2012;3(2):217–223.



29. Yu G. Using ggtree to Visualize Data on Tree-Like Structures. *Current protocols in bioinformatics*. 2020;69(1):e96.
30. Tonkin-Hill G, Lees JA, Bentley SD, Frost SD, Corander J. Fast hierarchical Bayesian analysis of population structure. *Nucleic acids research*. 2019;47(11):5539–5549.
31. Cheng L, Connor TR, Sirén J, Aanensen DM, Corander J. Hierarchical and spatially explicit clustering of DNA sequences with BAPS software. *Molecular biology and evolution*. 2013;30(5):1224–1228.
32. Corander J, Waldmann P, Marttinen P, Sillanpää MJ. BAPS 2: enhanced possibilities for the analysis of genetic population structure. *Bioinformatics*. 2004;20(15):2363–2369.
33. Murtagh F, Legendre P. Ward’s hierarchical agglomerative clustering method: which algorithms implement Ward’s criterion? *Journal of classification*. 2014;31(3):274–295.
34. Heller KA, Ghahramani Z. Bayesian hierarchical clustering. In: *Proceedings of the 22nd international conference on Machine learning*; 2005. p. 297–304.
35. Ziyatdinov A, Vázquez-Santiago M, Brunel H, Martinez-Perez A, Aschard H, Soria JM. lme4qtl: linear mixed models with flexible covariance structure for genetic studies of related individuals. *BMC bioinformatics*. 2018;19(1):1–5.
36. Astle W, Balding DJ. Population structure and cryptic relatedness in genetic association studies. *Statistical Science*. 2009;24(4):451–471.
37. Pagel M. Inferring evolutionary processes from phylogenies. *Zoologica Scripta*. 1997;26(4):331–348.
38. Yang J, Zaitlen NA, Goddard ME, Visscher PM, Price AL. Advantages and pitfalls in the application of mixed-model association methods. *Nature genetics*. 2014;46(2):100–106.
39. Lees JA, Galardini M, Bentley SD, Weiser JN, Corander J. Pyseer: a comprehensive tool for microbial pangenome-wide association studies. *Bioinformatics*. 2018;34(24):4310–4312.

40. Saber MM, Shapiro BJ. Benchmarking bacterial genome-wide association study methods using simulated genomes and phenotypes. *Microbial genomics*. 2020;6(3).
41. Lippert C, Listgarten J, Liu Y, Kadie CM, Davidson RI, Heckerman D. FaST linear mixed models for genome-wide association studies. *Nature methods*. 2011;8(10):833–835.
42. Kang HM, Sul JH, Service SK, Zaitlen NA, Kong Sy, Freimer NB, et al. Variance component model to account for sample structure in genome-wide association studies. *Nature genetics*. 2010;42(4):348–354.
43. Collins C, Didelot X. A phylogenetic method to perform genome-wide association studies in microbes that accounts for population structure and recombination. *PLoS computational biology*. 2018;14(2):e1005958.
44. Didelot X, Wilson DJ. ClonalFrameML: efficient inference of recombination in whole bacterial genomes. *PLoS Comput Biol*. 2015;11(2):e1004041.
45. Friedman J, Hastie T, Tibshirani R. Regularization paths for generalized linear models via coordinate descent. *Journal of statistical software*. 2010;33(1):1.
46. Lees JA, Mai TT, Galardini M, Wheeler NE, Horsfield ST, Parkhill J, et al. Improved prediction of bacterial genotype-phenotype associations using interpretable pangenome-spanning regressions. *Mbio*. 2020;11(4).
47. Bulik-Sullivan BK, Loh PR, Finucane HK, Ripke S, Yang J, Patterson N, et al. LD Score regression distinguishes confounding from polygenicity in genome-wide association studies. *Nature genetics*. 2015;47(3):291.
48. Bishara AJ, Hittner JB. Reducing bias and error in the correlation coefficient due to nonnormality. *Educational and psychological measurement*. 2015;75(5):785–804.
49. Croucher NJ, Walker D, Romero P, Lennard N, Paterson GK, Bason NC, et al. Role of conjugative elements in the evolution of the multidrug-resistant pandemic clone *Streptococcus pneumoniae* Spain23F ST81. *Journal of bacteriology*. 2009;191(5):1480–1489.

50. Koenker R. quantreg: Quantile Regression; 2021. Available from:  
<https://CRAN.R-project.org/package=quantreg>.
51. Fusi N, Lippert C, Lawrence ND, Stegle O. Warped linear mixed models for the genetic analysis of transformed phenotypes. *Nature communications*. 2014;5(1):1-8.
52. Zhou X, Stephens M. Genome-wide efficient mixed-model analysis for association studies. *Nature genetics*. 2012;44(7):821-824.
